# Supplementary material for: Tracing Baculovirus AcMNPV Infection Using a Real-Time Method Based on ANCHORTM DNA Labeling Technology
Source: MDPI journal article supplement (doi:10.3390/v12010050), 2020-01-02
Supplement: s1 [file s1]

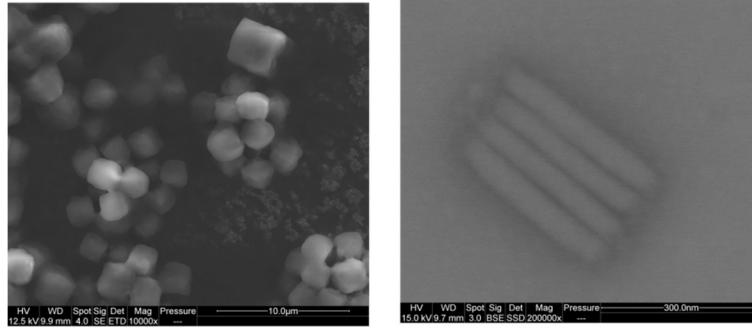

Figure S1. Electron microscopy observations of AcMNPV1-ANCHOR3 (a) Scanning electron microscopy of OBs and (b) Transmission electron microscopy of ODVs.
